# Supplementary material
Source: publisher figshare collection journal article supplement (https://acs.figshare.com/ndownloader/files/4191367)

# Temperature Sensitive Swelling of Poly(N-isopropylacrylamide) Brushes with Low Molecular Weight and Grafting Density

*Eva Bittrich, Sina Burkert, Martin Müller, Klaus-Jochen Eichhorn, Manfred Stamm, Petra Uhlmann*

Leibniz Institute of Polymer Research Dresden, Hohe Strasse 6, D-01069 Dresden, Germany

\* To whom correspondence should be addressed: uhlmannp@ipfdd.de

## Supporting Informations

In a recent paper of Maeda FTIR spectra on highly concentrated PNIPAAm D<sub>2</sub>O solutions [34] were analyzed applying curve fitting analysis of the Amide I and Amide II band lineshape by band components (presumably Gaussian/Lorentzian ones, respectively). The spectrum of PNIPAAm recorded at  $T = 25^{\circ}\text{C} < T_p$  (referred as “phase transition temperature”) could be fitted by a single component at  $1625\text{ cm}^{-1}$ , while the spectrum at  $T = 40^{\circ}\text{C}$  ( $T > T_p$ ) could be fitted by two components at  $1650$  and  $1625\text{ cm}^{-1}$ . According to [32] based on density functional theory (DFT) the  $1625\text{-cm}^{-1}$  component was assigned to H-bonding carbonyl groups to two water molecules and the  $1650\text{-cm}^{-1}$  component to singly H-bonding carbonyl groups to another amide group or one water molecule.”

We like to share this concept for the application on PNIPAAm brush films and fitted our spectra including also the  $\nu_a(\text{CH}_3)$  and the Amide II band using a protocol described earlier therein [1]. In the Fig. 11a results on curve fitting of the ATR-FTIR spectra recorded at  $T=22^{\circ}\text{C}$  and  $T=44^{\circ}\text{C}$  for the fitted range between  $1700$  and  $1500\text{ cm}^{-1}$  are given. For both temperatures two Amide I ( $1654$  and  $1628\text{ cm}^{-1}$ ) and two Amide II ( $1558$  and  $1537\text{ cm}^{-1}$ ) components were needed to obtain appropriate fits. Note that applying H<sub>2</sub>O instead of D<sub>2</sub>O Amide I band (components) have blue shifts to slightly higher wavenumbers and Amide II band is *not* red shifted by around  $100\text{ cm}^{-1}$ . Hence we assign the  $1654\text{-}$  and  $1537\text{-cm}^{-1}$  components to amide groups of high internal and low external hydrogen bonding degree to water and the  $1628\text{-}$  and  $1558\text{-cm}^{-1}$  components to those with low internal and high external hydrogen bonding degree to water. Since two Amide I or Amide II components, respectively, were needed to fit the low and high T-spectrum, qualitatively it can be concluded, that PNIPAAm brush films at high T ( $T > T_p$ ) still contain a considerable amount of

external hydrogen bonding to water. Also from this it can be concluded, that at low  $T$  ( $T < T_P$ ) PNIPAAm brushes still contain a considerable amount of internal hydrogen bonding. In contrast Maeda [32] needed only one component to fit the low temperature spectrum of PNIPAAm in solution, from which unlike the brush state a complete hydration of PNIPAAm in the solution state can be derived.

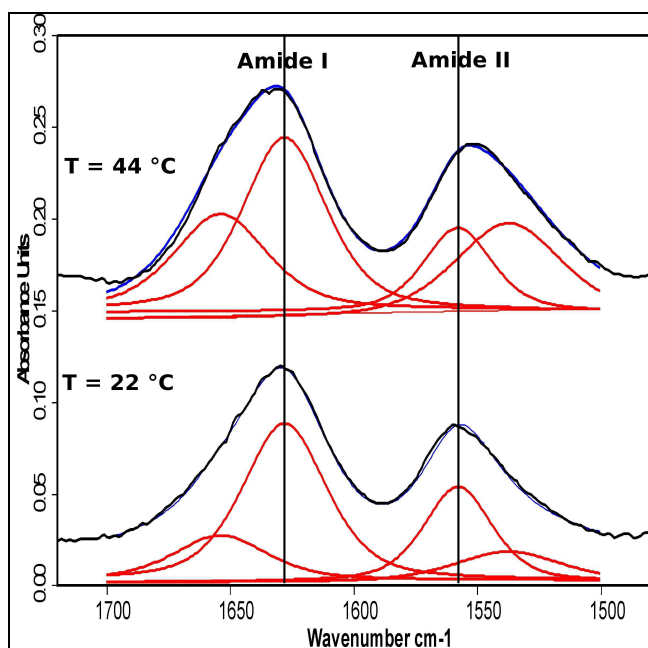

Fig. 11a. Results on curve fitting the Amide I ( $1654, 1628 \text{ cm}^{-1}$ ) and Amide II ( $1558, 1537 \text{ cm}^{-1}$ ) band lineshape in ATR-FTIR spectra of the PNIPAAm ( $132 \text{ kg/mol}$ ) brush in contact to PBS buffer at  $T=22^\circ\text{C}$  (bottom) and  $T=44^\circ\text{C}$  (top) with two components. Original (black), fitted (blue) spectra and components (red) are shown.

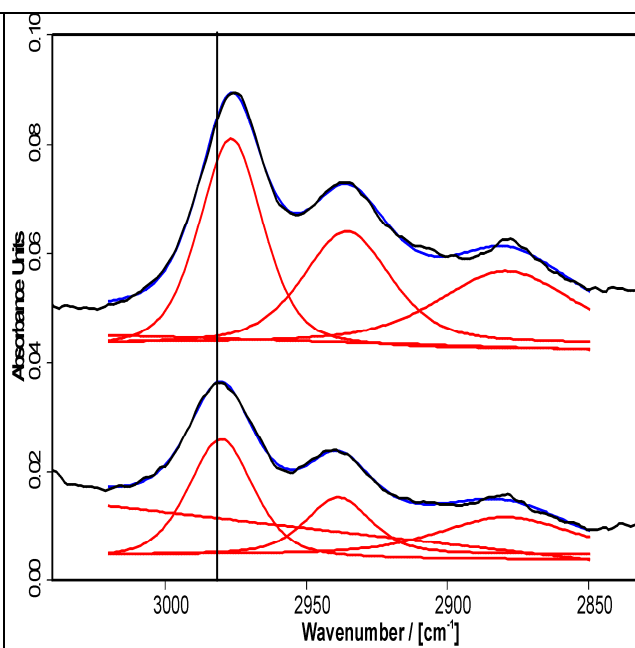

Fig. 11a. Results on curve fitting the  $v(\text{CH})$  band lineshape in ATR-FTIR spectra of the PNIPAAm ( $132 \text{ kg/mol}$ ) brush in contact to PBS buffer at  $T=22^\circ\text{C}$  (bottom) and  $T=44^\circ\text{C}$  (top). Original (black), fitted (blue) spectra and components (red) are shown.

Analogously to the Amide I band region lineshape analysis was applied on the  $v(\text{CH})$  region of the ATR-FTIR spectra, which is shown in the Fig. 11b. Unlike the Amide I and Amide II bands, only one component at  $2980 \text{ cm}^{-1}$  was found for the  $v(\text{CH}_3)$  band of the low  $T$  ATR-FTIR spectrum and one at  $2976 \text{ cm}^{-1}$  for the high  $T$  spectrum. For the spectra in between both components at  $2980$  and  $2976 \text{ cm}^{-1}$  were found. From this finding we conclude that the methyl groups of PNIPAAm are

influenced by the type of hydrogen bonding (external/internal) but unlike the amide groups a mixture prevails neither at low nor at high temperatures.

In the Fig 12a the integrals of the normalized  $\nu_a(\text{CH}_3)$ , Amide I and Amide components which increase by temperature (“hot components”) and in Fig. 12b those which decrease by temperature (“cold components”) are plotted versus T. For all components rather continuous courses, like that shown in the Fig. 10b for the wavenumber positions, were found, which is supported by theoretical predictions, that the collapse of the surface-grafted polymer brushes proceeds continuously with increasing temperature [37, 38].

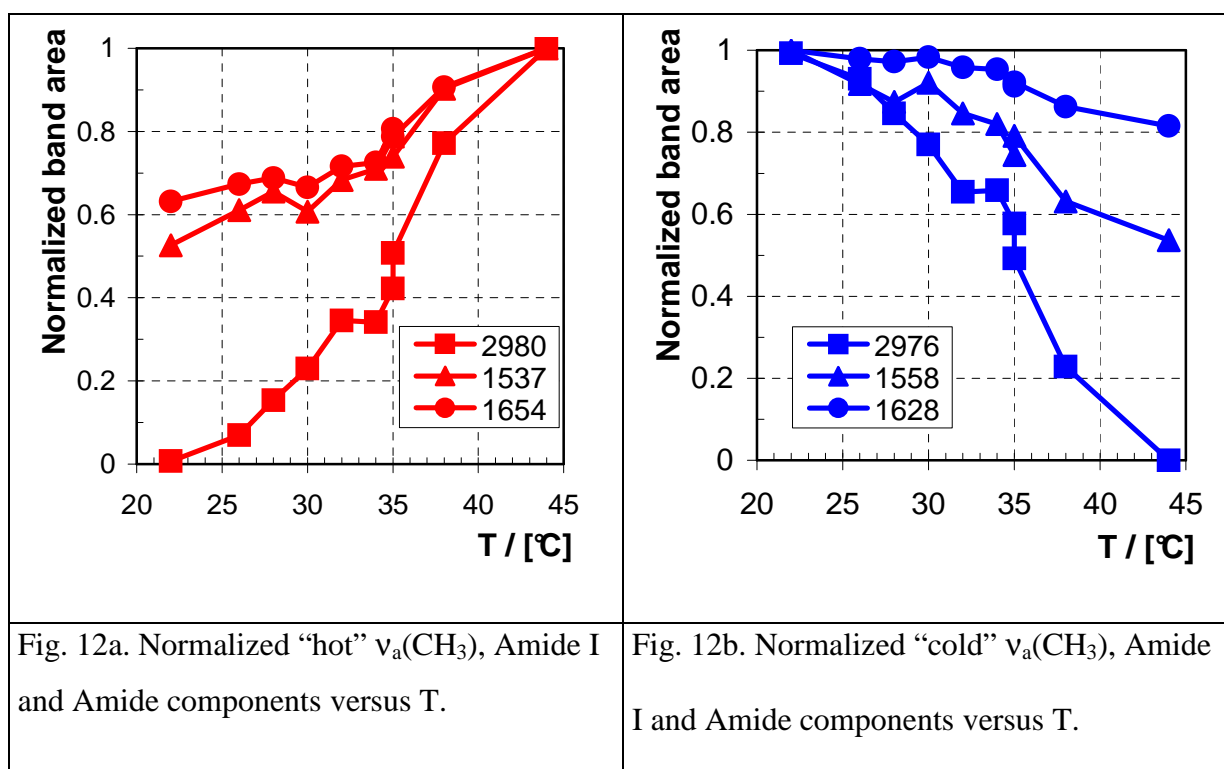

Supplement: Supplementary file 1 [file 4191367]
